# Supplementary material
Source: publisher site journal article supplement (https://www.dovepress.com/article/supplementary_file/603751/603751%20Revised%20Supplemental%20Table%201.docx)
Supplement: Supplementary file 1 [file 603751%20Revised%20Supplemental%20Table%201.docx]

| **Reasons for Failure, n (%)** | **Xen63 (n = 65)** | **Preserflo (n=75)** | ***p*** |
| --- | --- | --- | --- |
| Reoperation | 5 (7.7) | 1 (1.3) | 0.09 |
| Loss of light perception | 1 (1.5) | - | 0.46 |
| Persistent hypotony** | 1 (1.5) | 1 (1.3) | 1.00 |
| Medication administration | 10 (15.4) | 10 (13.3) | 0.81 |
| IOP reduction < 20% from baseline | 5 (7.7) | 4 (5.3) | 0.73 |
| IOP > 17 mmHg | 1 (1.5) | 3 (4.0) | 0.62 |
| Total | 23 (35.4) | 19 (25.3) | 0.20 |

**Supplemental Table 1 -** Primary Reasons for Failure*

* For the primary outcome of IOP criteria between 6 to 17 mmHg with ≥ 20% reduction from baseline

** IOP < 6 mmHg with 2 or more lines of vision loss from baseline on two consecutive visits
